# Supplementary material for: Expert-guided optimization for 3D printing of soft and liquid materials
Source: PubMed Central journal article supplement (PMC5886457; doi:10.1371/journal.pone.0194890), 2018-04-05
Supplement: pone.0194890.s001.pdf [file pone.0194890.s001.pdf]

Cylinder

Stringiness

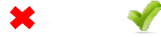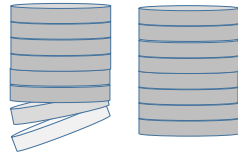

Low 0/10      Middle 5/10      High 10/10

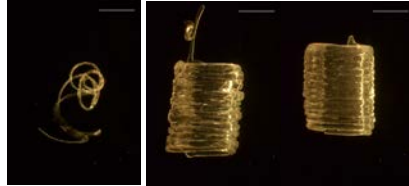

Run#8      Run#60      Run#52

Infill

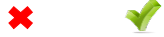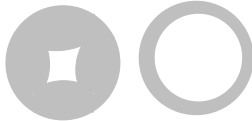

Low 0/10      Middle 4/10      High 10/10

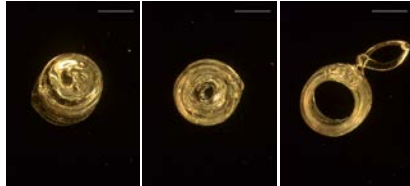

Run#13      Run#10      Run#1

Fusion

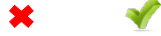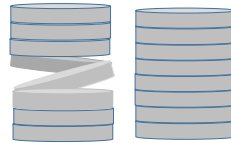

Low 0/10      Middle 5/10      High 10/10

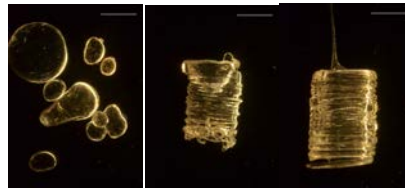

Run#57      Run#19      Run#25

Cube

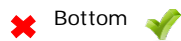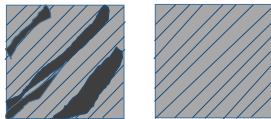

Low 0/10      Middle 5/10      High 10/10

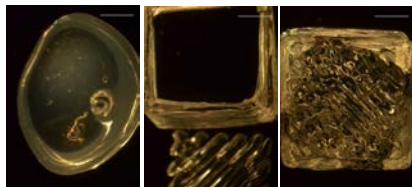

Run#45      Run#26      Run#43

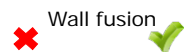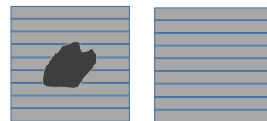

Low 0/10      Middle 5/10      High 10/10

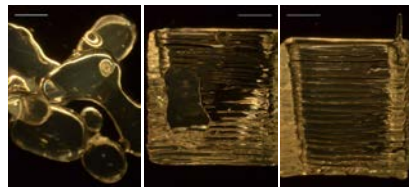

Run#52      Run#47      Run#51
