# Supplementary material for: Expert-guided optimization for 3D printing of soft and liquid materials
Source: PubMed Central journal article supplement (PMC5886457; doi:10.1371/journal.pone.0194890), 2018-04-05
Supplement: pone.0194890.s004.pdf [file pone.0194890.s004.pdf]

### Cylinder fusion

| Description | A cylinder is fused when the layers are joined together, without spaces or tears in between. Please choose one of the following to describe the extent of cylinder fusion for the following cylinder shown (No layer fusion = 0; Fully fused layers = 10): |
|-------------|------------------------------------------------------------------------------------------------------------------------------------------------------------------------------------------------------------------------------------------------------------|
| Score       | Rubric                                                                                                                                                                                                                                                     |
| 0           | No apparent cylinder structure, mostly disconnected pieces of string/filaments.                                                                                                                                                                            |
| 1           | No apparent cylinder structure, one long piece of string (the cylinder turns and twists can be seen throughout the string)                                                                                                                                 |
| 2           | No cylinder structure, a few (2 to 3) layers fused together.                                                                                                                                                                                               |
| 3           | No cylinder structure, some (4 to 6) layers fused together.                                                                                                                                                                                                |
| 4           | A cylinder shape, but with major damage (e.g., ripped wall). A cylinder skeleton.                                                                                                                                                                          |
| 5           | A cylinder shape with one fully fused wall side, but other walls sides are partially fused.                                                                                                                                                                |
| 6           | A cylinder shape with no major rips or cuts, but poor joining between many layers.                                                                                                                                                                         |
| 7           | A cylinder shape with two completely fused structures with a major cut between them.                                                                                                                                                                       |
| 8           | A cylinder shape where some lack of fusion of layers (not all on one wall side) is only apparent after physical inspection.                                                                                                                                |
| 9           | A cylinder shape that looks fully fused, after physical inspection (as seen from tweezer pressures) minor unfused layer can be seen.                                                                                                                       |
| 10          | A cylinder shape with all layers fused. Physical stretching (as seen from tweezer pressures) does not tear the cylinder.                                                                                                                                   |
