# Supplementary material for: Expert-guided optimization for 3D printing of soft and liquid materials
Source: PubMed Central journal article supplement (PMC5886457; doi:10.1371/journal.pone.0194890), 2018-04-05
Supplement: pone.0194890.s005.pdf [file pone.0194890.s005.pdf]

**Cylinder infill**

| <b>Description</b> | A cylinder has no infill if it is hollow.<br>Please choose one of the following to describe the extent of cylinder infill for the following cylinder shown (Full = 0, Hollow = 10): |
|--------------------|-------------------------------------------------------------------------------------------------------------------------------------------------------------------------------------|
| <b>Score</b>       | <b>Rubric</b>                                                                                                                                                                       |
| 0                  | Cylinder is full from beginning to end or cylinder shape cannot be distinguished.                                                                                                   |
| 1                  | Cylinder is ~75% (3/4) filled.                                                                                                                                                      |
| 2                  | Cylinder is ~50%-60% filled.                                                                                                                                                        |
| 3                  | Cylinder is filled at some part of the ends about ~30%.                                                                                                                             |
| 4                  | Cylinder has a severe hourglass: the top and bottom are hollow, but the middle part has full infill.                                                                                |
| 5                  | Cylinder has a mild hourglass: the top and bottom are hollow, but the middle part has some thin infill.                                                                             |
| 6                  | Cylinder does not seem to have an hourglass shape, but some parts slightly bulge in although doesn't block the view of the other end.                                               |
| 7                  | Cylinder is hollow but the wall thickness varies dramatically.                                                                                                                      |
| 8                  | Cylinder is hollow but the wall thickness varies mildly.                                                                                                                            |
| 9                  | Cylinder is almost perfectly hollow, walls are uniform but too thick.                                                                                                               |
| 10                 | The cylinder is perfectly hollow.                                                                                                                                                   |
