# Supplementary material for: Expert-guided optimization for 3D printing of soft and liquid materials
Source: PubMed Central journal article supplement (PMC5886457; doi:10.1371/journal.pone.0194890), 2018-04-05
Supplement: pone.0194890.s006.pdf [file pone.0194890.s006.pdf]

**Cylinder end stinginess**

|                    |                                                                                                                                                                                                                                                                                        |
|--------------------|----------------------------------------------------------------------------------------------------------------------------------------------------------------------------------------------------------------------------------------------------------------------------------------|
| <b>Description</b> | A cylinder end has stringiness when the filament at the end of the cylinder hangs loose or came off and is not fused.<br>Please choose one of the following to describe the extent of cylinder end stringiness for the cylinder shown (Ends are stringy = 0, No end stringiness = 10): |
| <b>Score</b>       | <b>Rubric</b>                                                                                                                                                                                                                                                                          |
| 0                  | No apparent cylinder structure.                                                                                                                                                                                                                                                        |
| 1                  | Cylinder is one long string that twists into a cylinder-looking shape or a cylinder skeleton.                                                                                                                                                                                          |
| 2                  | Cylinder has only 1-4 fused layers, but is mostly strings that twists into a cylinder-looking shape.                                                                                                                                                                                   |
| 3                  | A cylinder shape, but middle of cylinder is stringy (several mid-layers not fused).                                                                                                                                                                                                    |
| 4                  | Well-defined cylinder structure with 2-4 layers of one or both end strings came off.                                                                                                                                                                                                   |
| 5                  | Well-defined cylinder structure but last layer of one or both ends came off.                                                                                                                                                                                                           |
| 6                  | Well-defined cylinder structure with 2-4 layers of hanging string (unfused) at one end.                                                                                                                                                                                                |
| 7                  | Well-defined cylinder structure but last layer on one end is hanging/unfused.                                                                                                                                                                                                          |
| 8                  | Well-defined cylinder structure, the end seems fused, but pressure (tweezer squeeze) shows the last layers are only <u>semi-attached</u> to the cylinder.                                                                                                                              |
| 9                  | Well-defined cylinder structure, the end seems fused, but pressure (tweezer squeeze) shows the last <u>layer</u> to be nearly <u>completely</u> attached to the cylinder.                                                                                                              |
| 10                 | Well-defined cylinder structure with no hanging strings. Pulling the top and bottom layers does not detach the layers.                                                                                                                                                                 |
