# Supplementary material for: Expert-guided optimization for 3D printing of soft and liquid materials
Source: PubMed Central journal article supplement (PMC5886457; doi:10.1371/journal.pone.0194890), 2018-04-05
Supplement: pone.0194890.s007.pdf [file pone.0194890.s007.pdf]

| <b>Factors on the print parameter space (Skeinforge slicer)</b> |                                                                                                                                                                                                                                 |                                                       |                                                                                                            |
|-----------------------------------------------------------------|---------------------------------------------------------------------------------------------------------------------------------------------------------------------------------------------------------------------------------|-------------------------------------------------------|------------------------------------------------------------------------------------------------------------|
| <b>Factors</b>                                                  | <b>Factor definition</b>                                                                                                                                                                                                        | <b>Factor range</b>                                   | <b>Selected factor levels</b>                                                                              |
| Speed (mm/s)                                                    | Sets the feed rate and flow rate.                                                                                                                                                                                               | 2 to 50                                               | 7, 10, 13, 17, 19, 20, 23, 25, 26                                                                          |
| Filament packing density                                        | Effective filament diameter after accounting for the pinch wheel teeth grab on the filament.                                                                                                                                    | 0.7 to 1                                              | 0.2, 0.4, 0.5, 0.52, 0.54, 0.56, 0.58, 0.6, 0.75, 0.8                                                      |
| Layer height (mm)                                               | Height of the layers the object is cut into, in the z direction.                                                                                                                                                                | 0.1 to 1                                              | 0.28, 0.381, 0.4064, 0.6, 0.635, 0.84, 0.9652, 1.2, 1.2192, 1.346, 1.52, 2.1082 (based on nozzle diameter) |
| Tower                                                           | Extrudes a disconnected region for a few layers, then go to another disconnected region and extrude there.                                                                                                                      | On/Off                                                | On/Off                                                                                                     |
| Comb                                                            | Bends the extruder travel paths around holes in the slices, to avoid stringers.                                                                                                                                                 | On/Off                                                | On/Off                                                                                                     |
| Retraction distance (mm)                                        | Amount the extruder retracts the extruded filament whenever an extruder stop is commanded.                                                                                                                                      | 0 to 100                                              | 0.1, 0.2, 0.3, 0.4, 0.5, 0.6, 1, 2                                                                         |
| Solid surface thickness (mm)                                    | Number of solid layers that are at the bottom, top, plateaus and overhang.                                                                                                                                                      | 0 to 5                                                | 1, 2, 3, 4, 5, 6                                                                                           |
| Infill pattern                                                  | Pattern used to create infill                                                                                                                                                                                                   | grid circular, grid hexagonal, grid rectangular, line | grid circular, grid hexagonal, grid rectangular, line                                                      |
| Grid extra overlap (ratio)                                      | Amount of extra overlap added when extruding the grid to compensate for the fact that when the first thread going through a grid point is extruded, since there is nothing there yet for it to connect to it will shrink extra. | 0 to 0.5                                              | 0, 0.5, 1                                                                                                  |
| Infill solidity (ratio)                                         | Solidity of the infill                                                                                                                                                                                                          | 0.04 to 0.3                                           | 0, 0.5, 1                                                                                                  |
