# Supplementary material for: Expert-guided optimization for 3D printing of soft and liquid materials
Source: PubMed Central journal article supplement (PMC5886457; doi:10.1371/journal.pone.0194890), 2018-04-05
Supplement: pone.0194890.s010.pdf [file pone.0194890.s010.pdf]

| <b>Cube bottom</b> |                                                                                                                                                                                  |
|--------------------|----------------------------------------------------------------------------------------------------------------------------------------------------------------------------------|
| <b>Description</b> | Please choose one of the following to describe the condition of the cube bottom shown from a top and underneath view of the cube:                                                |
| <b>Score</b>       | <b>Rubric</b>                                                                                                                                                                    |
| 0                  | Cube cannot be distinguished, therefore neither can a bottom.                                                                                                                    |
| 1                  | Cube is bottomless (walls are there though).                                                                                                                                     |
| 2                  | Cube is full from beginning to end (and some silicone may be bulging out).                                                                                                       |
| 3                  | Cube bottom is made of a loop pattern of only one layer loosely attached. Area between loops is empty.                                                                           |
| 4                  | Cube bottom is made of a loop pattern of only one layer that is attached. Area between loops is empty.                                                                           |
| 5                  | Cube has a bottom completely detached from the rest of cube.                                                                                                                     |
| 6                  | Cube bottom is made of some inconsistent pattern. Portions of the bottom are filled, some chunks are empty.                                                                      |
| 7                  | Cube bottom is made of overlaying loop patterns (or some pattern), some small holes are seen <u>and/or</u> the perimeter of the cube bottom is loosely attached.                 |
| 8                  | Cube bottom has no inconsistencies/holes, but the bottom appears to be too thick (thicker than ~ 2 mm).                                                                          |
| 9                  | Cube bottom consists of one ~ 2 mm layer that with inspection (pulling/poking) has some lines not well fused <u>and/or one</u> of the bottom perimeter rims is loosely attached. |
| 10                 | The cube has a nice bottom without holes and without excess filling (~2 mm thickness).                                                                                           |
