# Supplementary material for: Expert-guided optimization for 3D printing of soft and liquid materials
Source: PubMed Central journal article supplement (PMC5886457; doi:10.1371/journal.pone.0194890), 2018-04-05
Supplement: pone.0194890.s011.pdf [file pone.0194890.s011.pdf]

| <b>Factors on the print parameter space (Simplify 3D slicer)</b> |                                                                             |                                                                                                                                           |                                                                             |
|------------------------------------------------------------------|-----------------------------------------------------------------------------|-------------------------------------------------------------------------------------------------------------------------------------------|-----------------------------------------------------------------------------|
| <b>Factors</b>                                                   | <b>Factor definition</b>                                                    | <b>Factor range</b>                                                                                                                       | <b>Selected factor levels</b>                                               |
| Nozzle diameter (mm)                                             | Diameter of syringe nozzle.                                                 | 0 to 200                                                                                                                                  | 0.6, 0.635, 0.84, 0.9652, 1.2, 1.2192, 1.52, 2.1082                         |
| Primary layer height (mm)                                        | Thickness of each printed outline layer.                                    |                                                                                                                                           |                                                                             |
| Bottom Solid Layers                                              | Number of solid layers to require at the bottom of the part.                | 0 to 99999                                                                                                                                | 0,1, 2, 3, 4                                                                |
| Default printing speed (mm/min)                                  | Initial speed used for all printing movements.                              | 0.1 to 100000                                                                                                                             | 10 mm/s, 50 mm/s, 70 mm/s, 100 mm/s, 150 mm/s                               |
| External Fill Pattern                                            | Determines the infill pattern used for the external surfaces of the part.   | Concentric, rectilinear                                                                                                                   | Concentric, rectilinear                                                     |
| Retraction                                                       | Reverses filament direction at the end of a loop to help prevent stringing. | On/Off                                                                                                                                    | On/Off                                                                      |
| Outline/Perimeter Shells                                         | Number of shells to use for the extruder skin of the part.                  | 0 to 99999                                                                                                                                | 1, 2, 3                                                                     |
| Single outline corkscrew printing mode                           | Gradually increment the Z-axis to avoid any layer change seams.             | On/Off                                                                                                                                    | On/Off                                                                      |
| Start points                                                     | Determines location of layer start point for 3D printing.                   | Random, Optimize, Choose                                                                                                                  | Random, Optimize                                                            |
| Outline overlap (%)                                              | Percentage of extrusion width that will overlap with outline perimeters.    | 0 to 99                                                                                                                                   | 10, 30, 40                                                                  |
| Thin wall behavior                                               | Provides options for processing thin walls.                                 | Use perimeters, gap fill                                                                                                                  | Use perimeters, gap fill                                                    |
| Ooze control behavior                                            | Provides options for controlling ooze.                                      | Retract when crossing, Force retraction between layers, Minimum travel for retraction, Retract during wipe, Only wipe for outer-perimeter | Retract when crossing, Force retraction between layers, Retract during wipe |
| Tool change retraction distance (mm)                             | How much plastic to pull back into nozzle after a tool change.              | 0 to 200                                                                                                                                  | 5, 12                                                                       |
