# Supplementary material for: Expert-guided optimization for 3D printing of soft and liquid materials
Source: PLOS journal article supplement (doi:10.1371/journal.pone.0194890), 2018-04-05
Supplement: S8 (10.1371/journal.pone.0194890.s008) [file journal.pone.0194890.s008]

| Factors on the physical parameter space |                                                                                            |                                                                        |                                                                                                                  |
|-----------------------------------------|--------------------------------------------------------------------------------------------|------------------------------------------------------------------------|------------------------------------------------------------------------------------------------------------------|
| Factors                                 | Factor definition                                                                          | Factor range                                                           | Selected factor levels                                                                                           |
| Bath type                               | Polyacrylic bath used to support 3D prints                                                 | In this study, restricted to Carbomers                                 | Carbopol 940, Carbopol 1342, Carbopol 941, Carbopol Ultrez 10, Carbopol 934, Carbopol 974, ETD2020, Pemulen 1621 |
| Bath concentration (% w/v)              | Concentration of Carbopol 940 and ETD2020 support bath used to support prints              | Many possibilities                                                     | 0.1, 0.2, 0.5, 1, 2                                                                                              |
| Ink type                                | Silicone elastomer used as extrusion (ink) material for 3D printing                        | Many possibilities, the primary focus is to 3D print Sylgard 184       | Sylgard 184, Sylgard 186, Sylgard 567, Dow Corning 3-4241                                                        |
| Bath pH                                 | pH of polymeric support bath used to support prints                                        | 0 to 14                                                                | 5, 6.5, 7, 7.5, 8                                                                                                |
| Ink concentration (Catalyst:Base)       | Silicone elastomer catalyst to base ratio used as extrusion (ink) material for 3D printing | Many possibilities, which can be bound by manufacturer recommendations | 1:10, 1.1:10, 1.2:10, 1.3:10, 1.4:10, 1.5:10, 1.8:10, 0.5:10, 2:10                                               |
| Bath stirring time (h)                  | Period used to stir the polymeric support bath in preparation for 3D printing              | Many possibilities                                                     | 4, 8, 12                                                                                                         |
| Ink curing time (h)                     | Period the silicone elastomer was left to heat cure in oven                                | Many possibilities, which can be bound by manufacturer recommendations | 3, 7, 18                                                                                                         |
